# Supplementary material for: Chitosan/Zeolite Composite Aerogels for a Fast and Effective Removal of Both Anionic and Cationic Dyes from Water
Source: MDPI journal article supplement (doi:10.3390/polym13111691), 2021-05-22
Supplement: s1 [file s1]

# Supporting Information: Chitosan/Zeolite Composite Aerogels for a Fast and Effective Removal of Both Anionic and Cationic Dyes from Water

Angela Marotta, Enrica Luzzi, Martina Salzano de Luna, Paolo Aprea, Veronica Ambroggi, Giovanni Filippone

## S1. FTIR analysis

Fourier Transform Infrared (FTIR) analysis was performed in Attenuated Total Reflectance (ATR) mode with a Perkin Elmer Spectrum 3 Delta. The ATR spectra of chitosan and chitosan-zeolite aerogels were recorded at a resolution of  $4\text{ cm}^{-1}$  and 4 scan collections and reported in Figure S1.

The spectrum of CS sample is characterized by stretching vibrations of OH and amine groups (around  $3300\text{ cm}^{-1}$ ) [1]. Moreover,  $\text{CH}_3$  symmetric stretching, C-O-C stretching, and C-OH stretching are visible at around  $2920\text{ cm}^{-1}$ ,  $1150\text{ cm}^{-1}$  and  $1065\text{ cm}^{-1}$ , respectively [1]. CS-ZX sample spectrum reflects the composition of the composite, with the compresence of the characteristic bands of zeolite ( $\sim 750$  and  $680\text{ cm}^{-1}$ : symmetrical stretching vibration of Al-O-Al and Si-O-Si [2];  $\sim 970\text{ cm}^{-1}$ : Si-O stretching vibrations [3]) and chitosan.

Crosslinking is induced by Glutaraldehyde in both samples, as proved by the presence of the peaks at  $1655\text{ cm}^{-1}$  and at  $1562\text{ cm}^{-1}$ , that can be addressed to the formation of imine  $\text{N}=\text{C}$  and ethylenic  $\text{C}=\text{C}$  bonds, respectively [1]. Moreover, complete crosslinking is ensured by the absence of unreacted GLA, as highlighted by the absence of free aldehydic groups peak at  $1720\text{ cm}^{-1}$  [1].

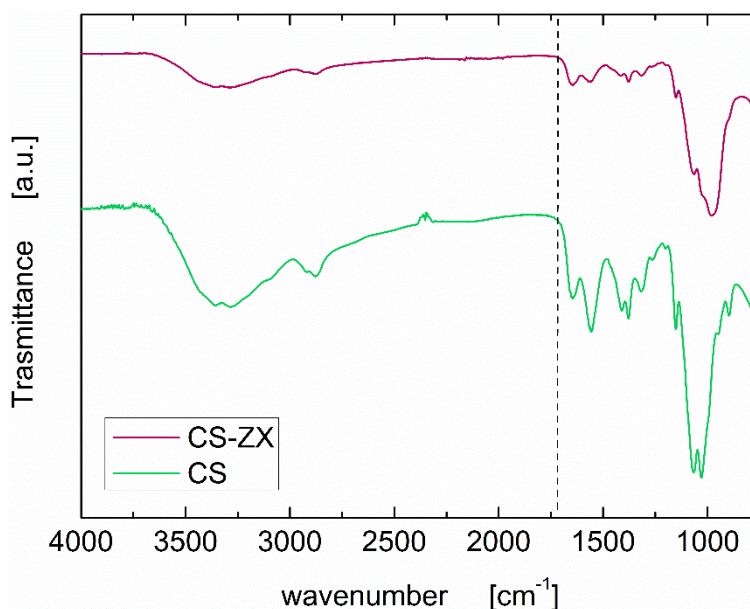

**Figure S1.** FTIR spectra of CS and CS-ZX aerogels. Baseline correction was applied to the spectra, which are also vertically shifted for the sake of clarity.

## S2. Fitting of adsorption isotherms

The adsorption isotherms in Figure 3 of the main text were fitted to the Langmuir and Freundlich models, according to Equation S1 and S2, respectively. The obtained best fitting parameters are reported in Table S1 together with R-squared parameter (RS).

$$q_e = \frac{q_e^{\max} b C_e}{1 + b C_e} \quad (S1)$$

$$q_e = k C_e^{1/n} \quad (S2)$$

**Table S1.** Langmuir and Freundlich model parameters for all the investigated systems.

|            |                     | IC                                           |                                              |                                              |
|------------|---------------------|----------------------------------------------|----------------------------------------------|----------------------------------------------|
|            |                     | CS                                           | CS-ZX                                        | ZX                                           |
| Langmuir   | $q_e^{\max}$ [mg/g] | 302.27±8.91                                  | 372.83±29.15                                 | 3.79·10 <sup>5</sup> ±1.66·10 <sup>8</sup>   |
|            | $b$ [L/mg]          | 0.32±0.06                                    | 2.96·10 <sup>-3</sup> ±4.41·10 <sup>-4</sup> | 2.69·10 <sup>-7</sup> ±1.18·10 <sup>-4</sup> |
|            | RS                  | 0.99                                         | 0.99                                         | 0.99                                         |
| Freundlich | $k$ [L/mg]          | 110.65±19.32                                 | 4.74±1.65                                    | 0.07±0.02                                    |
|            | $n$                 | 5.36±1.02                                    | 1.60±1.16                                    | 0.93±0.03                                    |
|            | RS                  | 0.93                                         | 0.99                                         | 0.99                                         |
|            |                     | MB                                           |                                              |                                              |
|            |                     | CS                                           | CS-ZX                                        | ZX                                           |
| Langmuir   | $q_e^{\max}$ [mg/g] | 9.20±1.90                                    | 7058.95±208.39                               | 850.81±304.32                                |
|            | $b$ [L/mg]          | 0.47·10 <sup>-3</sup> ±0.26·10 <sup>-2</sup> | 2.89·10 <sup>-4</sup> ±9.74·10 <sup>-5</sup> | 3.35·10 <sup>-4</sup> ±1.39·10 <sup>-4</sup> |
|            | RS                  | 0.86                                         | 0.99                                         | 0.99                                         |
| Freundlich | $k$ [L/mg]          | 0.49±0.30                                    | 0.32±0.05                                    | 0.51±0.08                                    |
|            | $n$                 | 1.14±0.03                                    | 1.11±0.03                                    | 2.44±0.62                                    |
|            | RS                  | 0.99                                         | 0.99                                         | 0.88                                         |

The kinetics in Figure 4 of the main text were fitted to the Pseudo First (equation S3) and Pseudo Second Order (Equation S4) and the obtained best fitting parameters are reported in Table S2 together with R-squared parameter.

$$q_t = q_e \left(1 - e^{-k_1 t}\right) \quad (S3)$$

$$q_t = \frac{q_e^2 k_2 t}{1 + q_e k_2 t} \quad (S4)$$

**Table S2.** Kinetic plots fitting parameters for CS-ZX aerogels.

|                     |                          | IC                                           | MB                          |
|---------------------|--------------------------|----------------------------------------------|-----------------------------|
| Pseudo First Order  | $q_e$ [mg/g]             | 94.96±1.79                                   | 30.77±0.69                  |
|                     | $k_1$ [s <sup>-1</sup> ] | 0.032±0.002                                  | 0.060±0.006                 |
|                     | RS                       | 0.99                                         | 0.98                        |
| Pseudo Second Order | $q_e$ [mg/g]             | 107.94±5.37                                  | 33.78±0.10                  |
|                     | $k_2$ [s <sup>-1</sup> ] | 3.54·10 <sup>-4</sup> ±8.78·10 <sup>-5</sup> | 0.002±3.88·10 <sup>-4</sup> |
|                     | RS                       | 0.97                                         | 0.98                        |

### S3. TGA analysis

Thermogravimetric (TG) analyses were carried out using a TGA Q500 (TA Instruments) with a heating rate of 20 °C min<sup>-1</sup> in air atmosphere from 25 °C to 700 °C. CS-ZX samples subjected to the three regeneration cycles have been dried overnight at 60 °C under vacuum and then subjected to thermogravimetric analysis. A representative thermogram is reported in Figure S2, together with that of a freshly prepared CS-ZX sample. Apart from the different content of adsorbed water (corresponding to the weight loss up to 200 °C), the two curves are comparable, suggesting that the leaching of zeolite after the regeneration cycles is essentially negligible.

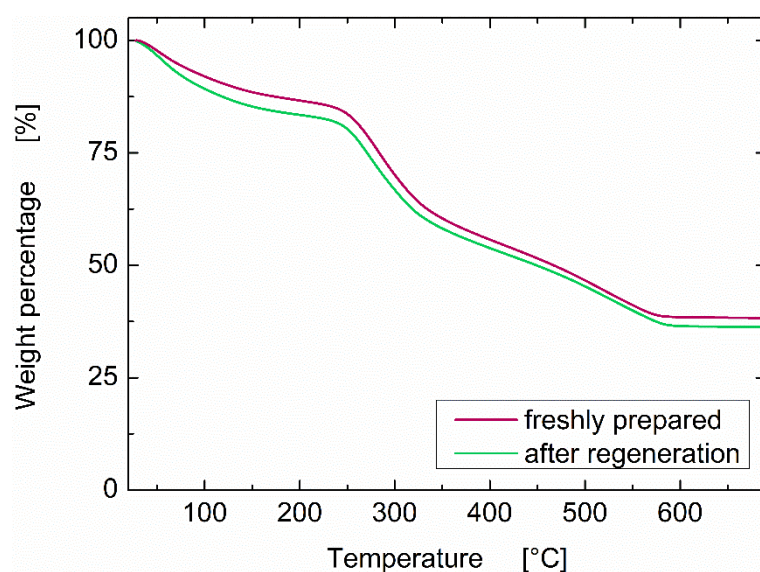

**Figure S2.** TG curves of CS-ZX aerogels freshly prepared and after three regeneration cycles.

## References

1. Salzano de Luna, M.; Ascione, C.; Santillo, C.; Verdolotti, L.; Lavorgna, M.; Buonocore, G.G.; Castaldo, R.; Filippone, G.; Xia, H.; Ambrosio, L. Optimization of dye adsorption capacity and mechanical strength of chitosan aerogels through crosslinking strategy and graphene oxide addition. *Carbohydr. Polym.* **2019**, *211*, 195–203, doi:10.1016/j.carbpol.2019.02.002.
2. Yi, H.; Yang, X.; Tang, X.; Zhao, S.; Wang, J.; Cui, X.; Feng, T.; Ma, Y. Removal of toluene from industrial gas over 13X zeolite supported catalysts by adsorption-plasma catalytic process. *J. Chem. Technol. Biotechnol.* **2017**, *92*, 2276–2286, doi:10.1002/jctb.5314.
3. Safak Boroglu, M.; Ali Gurkaynak, M. Fabrication and characterization of silica modified polyimide-zeolite mixed matrix membranes for gas separation properties. *Polym. Bull.* **2011**, *66*, 463–478, doi:10.1007/s00289-010-0286-x.
